# Supplementary material for: Quantifying arsenic and mercury in aqueous media via bio-inspired gold nanoparticles modified by mango leaf extract
Source: Royal Society of Chemistry journal article supplement (doi:10.1039/d3ra07293b), 2023-01-01
Supplement: d3ra07293b1.pdf [file d3ra07293b1.pdf]

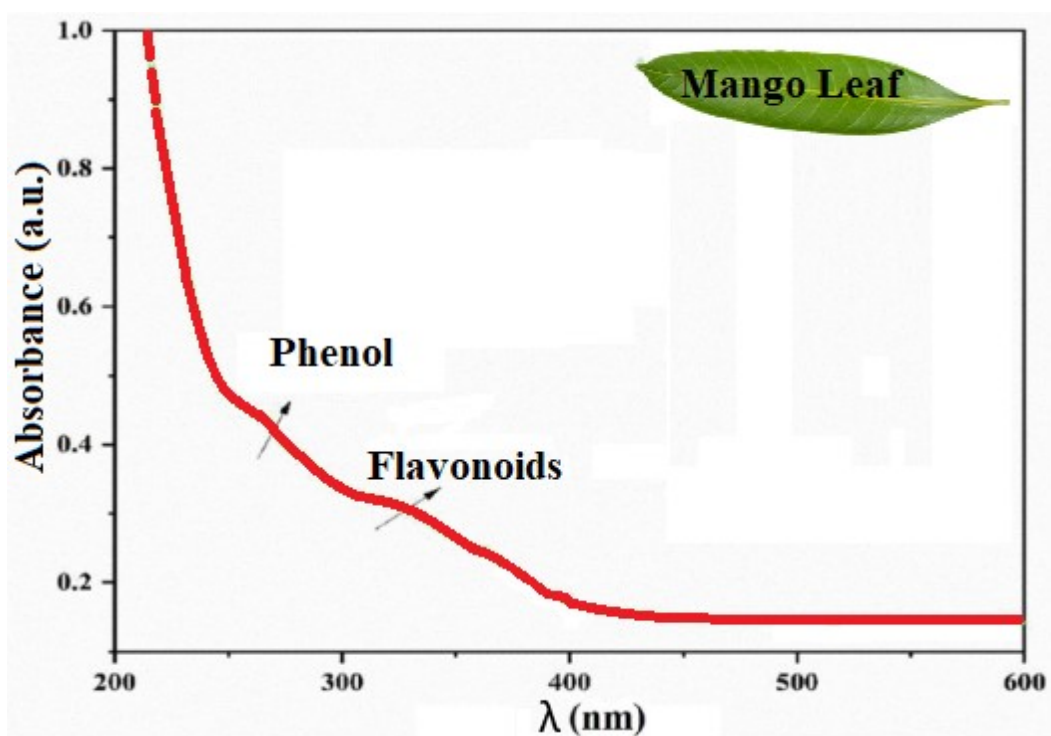

S1. UV-Vis spectra of Mango Leaf

Table T1. Recovery efficacy w.r.t As

| Spiked (ppb) | Attained (ppb) | RSD (%) |
|--------------|----------------|---------|
| 5            | 4.8            | 96      |
| 7            | 6.8            | 97      |
| 10           | 9.5            | 95      |

Table T2. Recovery efficacy w.r.t Hg

| Spiked (ppb) | Attained (ppb) | RSD (%) |
|--------------|----------------|---------|
| 5            | 4.6            | 92      |
| 7            | 6.9            | 98.6    |
| 10           | 9.7            | 97      |

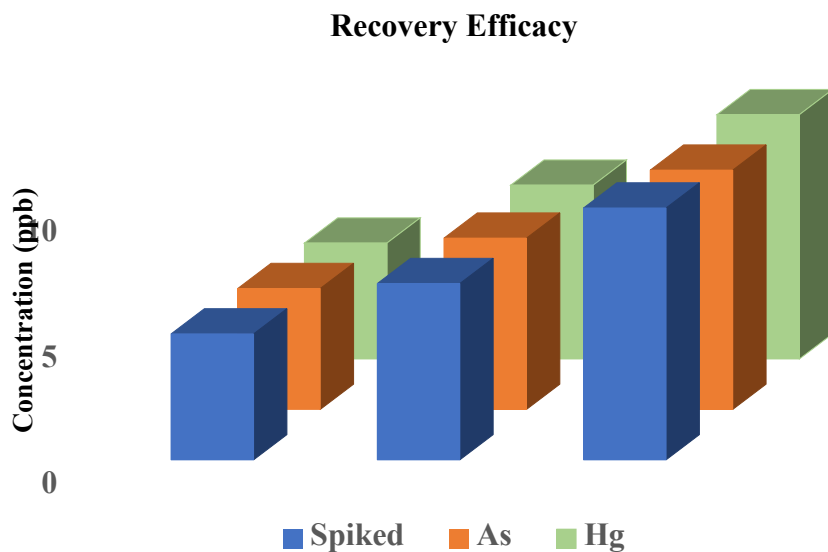

S2 Recovery efficacy w.r.t As and Hg of modified AuNPs via Mango Leaf Extract

Table T3: Comparative analysis of the sensing scheme with other reported works

| Sensing Mechanism          | Heavy Metal Ion                                          | Medium                                                               | Limit of Detection      | References |
|----------------------------|----------------------------------------------------------|----------------------------------------------------------------------|-------------------------|------------|
| Colorimetric               | Hg <sup>2+</sup> , Pb <sup>2+</sup> and Cu <sup>2+</sup> | papain-functionalized <u>gold nanoparticles</u>                      | 200 nM                  | [1]        |
| peroxidase-like activities | Pb <sup>2+</sup> and Hg <sup>2+</sup>                    | Gold nanoparticles                                                   | NP*                     | [2]        |
| Colorimetric               | Hg <sup>2+</sup>                                         | Cinamon modified gold Nanoparticles                                  | NP*                     | [3]        |
| Colorimetric               | Pb <sup>2+</sup>                                         | functionalized gold nanoparticles                                    | 310 ng mL <sup>-1</sup> | [4]        |
| Colorimetric               | As <sup>3+</sup>                                         | glutathione functionalized gold nanoparticles                        | NP*                     | [5]        |
| Colorimetric               | Hg <sup>2+</sup> Pb <sup>2+</sup>                        | dual-functional Ag/Au nanoparticles                                  | 5 nM, 1.4 nM            | [5]        |
| Colorimetric               | Pb <sup>2+</sup>                                         | SiO <sub>2</sub> <sup>core</sup> -Au <sub>shell</sub> nanocomposites | NP*                     | [6]        |

|              |                                      |                                        |            |           |
|--------------|--------------------------------------|----------------------------------------|------------|-----------|
| Colorimetric | Hg <sup>2+</sup>                     | biogenetic gold nanoparticles          | NP*        | [7]       |
| Colorimetric | As <sup>3+</sup><br>Hg <sup>2+</sup> | Mango leaf modified gold nanoparticles | 1, 1.3 ppb | This work |

\*-Not Provided

## References

- [1] Biosensors and Bioelectronics, 26, 10, 4064-4069, 2011
- [2] Anal. Chem. 2014, 86, 4, 2065–2072
- [3] Colloids and Surfaces A: Physicochemical and Engineering Aspects, 5 2017, 451-457,  
<https://doi.org/10.1080/00032719.2014.961641>
- [4] Analytical Letters, 48, 5, 2015
- [5] Optics & Laser Technology, 133, 2021, 106522
- [5] J. Mater. Chem. C, 2018,6, 7557-7567
- [6] Microchemical Journal, 124, 2016, Pages 104-110
- [7] Colloids and Surfaces A: Physicochemical and Engineering Aspects, 508, 2016, 360-365
